**Disentangling heterogeneity of psychosis expression in the general population:  
sex-specific moderation effects of environmental risk factors on symptom  
networks**

Linda T. Betz<sup>1</sup>, Nora Penzel<sup>1,2</sup>, Marlene Rosen<sup>1</sup>, Kamaldeep Bhui<sup>3,4</sup>, Rachel Upthegrove<sup>5,6</sup>,  
Joseph Kambertz<sup>1</sup>

<sup>1</sup> Department of Psychiatry and Psychotherapy, Faculty of Medicine and University Hospital of Cologne, Cologne, Germany

<sup>2</sup> Department of Psychiatry and Psychotherapy, Ludwig-Maximilian-University, Munich, Germany

<sup>3</sup> Department of Psychiatry, University of Oxford, Oxford, United Kingdom

<sup>4</sup> Nuffield Department of Primary Care Health Sciences, University of Oxford, United Kingdom

<sup>5</sup> Institute for Mental Health and Centre for Human Brain Health, University of Birmingham, Birmingham, United Kingdom

<sup>6</sup> Birmingham Early Intervention Service, Birmingham, United Kingdom

**Corresponding Author:**

Linda T. Betz, Department of Psychiatry and Psychotherapy, Faculty of Medicine and University Hospital of Cologne, Kerpener Str. 62, 50937 Cologne. E-mail: [linda.betz@uk-koeln.de](mailto:linda.betz@uk-koeln.de), Phone: +49 (0)221 – 478 7175.

**Word Count:** 4114 (text only, excluding abstract, references, tables/figures)

**Keywords:** psychosis; heterogeneity; sex differences; environmental risk factors; etiology; network analysis; recursive partitioning

**This is a preprint of a manuscript that has not been peer-reviewed.  
Supplementary Materials can be found below the manuscript.**

## Abstract

*Background:* Psychosis expression in the general population, which may reflect a behavioral manifestation of risk for psychotic disorder, can be conceptualized as an interconnected system of psychotic and affective experiences; a so-called ‘symptom network’. Differences in demographics, as well as exposure to adversities and risk factors, may produce substantial heterogeneity in symptom networks, highlighting potential etiological divergence in psychosis risk.

*Methods:* To explore this idea in a data-driven way, we employed a novel recursive partitioning approach in the 2007 English National Survey of Psychiatric Morbidity survey ( $n = 7,242$ ). We sought to identify ‘network phenotypes’ by explaining heterogeneity in symptom networks through potential moderators, including age, sex, ethnicity, deprivation, childhood abuse, separation from parents, bullying, domestic violence, cannabis use, and alcohol.

*Results:* Sex was the primary source of heterogeneity in symptom networks. Additional heterogeneity was explained by interpersonal trauma (*childhood abuse, domestic violence*) in women and *domestic violence, cannabis use, and ethnicity* in men. Among women, especially those exposed to early interpersonal trauma, an affective loading within psychosis may have distinct relevance. Men, particularly those from minority ethnic groups, demonstrated a strong network connection between hallucinatory experiences and persecutory ideation.

*Conclusion:* Symptom networks of psychosis expression in the general population are highly heterogeneous. The structure of symptom networks seems to reflect distinct sex-related adversities, etiologies, and mechanisms of symptom-expression. Disentangling the complex interplay of sex, minority ethnic group status, and other risk factors may help optimize early intervention and prevention strategies in psychosis.

## Introduction

Recent research has advanced our understanding of psychosis through so-called ‘symptom networks’, i.e., causal systems of individual interacting experiences and symptoms (Betz et al., 2020; Hardy et al., 2020; Isvoranu et al., 2016, 2017, 2019; Moffa et al., 2017; Murphy et al., 2018; Robinaugh et al., 2020). Complex interactions between specific psychotic as well as non-psychotic experiences (e.g., depression, anxiety) in the general population may predate onset of psychosis in clinical settings (Guloksuz et al., 2015, 2016; Kelleher et al., 2012; Linscott & van Os, 2013; Murphy et al., 2018; van Os & Reininghaus, 2016). Additional lines of evidence indicate that there is considerable etiological continuity between subclinical and clinical levels of psychosis (Binbay et al., 2012; DeRosse & Karlsgodt, 2015; Kelleher & Cannon, 2011; Linscott & van Os, 2013). Thus, examining the symptom network structure of a transdiagnostic psychosis phenotype, reflecting a behavioral manifestation of risk for psychotic disorder in the general population that blends gradually into clinical syndromes, may help to better understand etiological mechanisms in psychosis and to develop prevention strategies (Bebbington, 2015; Binbay et al., 2012; DeRosse & Karlsgodt, 2015; Isvoranu et al., 2016; Kelleher & Cannon, 2011; Linscott & van Os, 2013; Robinaugh et al., 2020; van Os & Reininghaus, 2016).

Importantly, symptomatology and involved etiological mechanisms in psychosis expression are highly variable by specific at risk groups (Bentall et al., 2012; Isvoranu et al., 2016; Linscott & van Os, 2013; van Os & Reininghaus, 2016). For example, in line with the theory of an affective pathway to psychosis, early traumatic events are strongly associated with connections between affective and psychotic symptomatology (Myin-Germeys & van Os, 2007; Upthegrove et al., 2015; van Nierop et al., 2015). In the presence of heterogeneity, averaged network models of psychosis may obscure important distinctions in relevant etiological mechanisms across specific risk groups (Jones et al., 2020; Moriarity et al., 2020).

Thus far, however, heterogeneity in symptom networks of psychosis has been either overlooked or addressed in a partial way on a single candidate risk factor (such as sex, cannabis use or socioeconomic background) at specific thresholds, or using summed environmental risk scores (Betz et al., 2020; Guloksuz et al., 2016; Isvoranu et al., 2016; Wüsten et al., 2018), which lose specificity and relevance for real work prevention and intervention.

The characterization of ‘network phenotypes’ based on a comprehensive set of environmental and demographic factors may explain heterogeneity; that is the structure of symptomatology is a function of types, combinations, and intensity of etiological loads in psychosis expression (Jones et al., 2020; Moriarity et al., 2020). With the goal of characterization of network phenotypes in mind, the current study uses novel work on recursive partitioning, a data-driven, explorative statistical technique that can sequentially extract isolated and combined moderation effects of a large set of environmental and demographic factors on symptom networks, without a priori specification of thresholds or combinations of risk factors (Jones et al., 2020; Strobl et al., 2009). Recursive partitioning identifies network phenotypes that are maximally distinct from each other (Jones et al., 2020; Zeileis et al., 2008).

We used recursive partitioning to define meaningful network phenotypes of psychosis expression in the general population, using the 2007 Adult Psychiatric Morbidity in England Survey (APMS; National Centre for Social Research, University of Leicester, 2017). We hypothesized that exposure to environmental risk, if identified as defining a network phenotype, would be characteristically associated with more densely connected symptom networks when compared with samples not exposed to that specific environmental risk (Guloksuz et al., 2015, 2016; Isvoranu et al., 2016; Lin et al., 2019; Russell et al., 2020). We

also aimed to test whether the strength of connections between individual symptoms differed between network phenotypes.

## Method

### Data analytic strategy

We conducted all analyses in the *R* language for statistical computing, version 4.0.4. Throughout, we considered a significance level of  $\alpha = .05$ . Data of the 2007 APMS (National Centre for Social Research, University of Leicester, 2017) used in the analyses are available from the UK Data Service (<https://ukdataservice.ac.uk/>). Code to reproduce the analyses can be accessed at [https://github.com/LindaBetz/APMS\\_NetworkTree](https://github.com/LindaBetz/APMS_NetworkTree).

### Sample

We present analyses based on the 2007 APMS of adults living in private households aged 16 and above who were recruited using a stratified multistage random probability sampling strategy ( $n = 7,403$ ) (McManus et al., 2009; Singleton et al., 2003). Methods, procedures, and full details on sample characteristics have been described previously (McManus et al., 2009). For the present analyses, we excluded participants with missing values in the variables of interest, given that the methods employed do not allow missings. For comparing sample characteristics of included and excluded participants, we used permutation tests as implemented in the *R* package ‘coin’ (Hothorn et al., 2008).

### Assessment of symptomatology

Selection and definition of symptom variables followed a previously published network analysis using data from the 2007 APMS (Moffa et al., 2017), including measures of worry, sleep disturbance, generalized anxiety, depression, persecutory ideation and hallucinatory experiences. All symptom variables in the network were coded in binary form (present or absent). For details on these assessments, see supplementary method 1.

### Assessment of environmental and demographic risk factors

Environmental risk factors comprised psychosocial adversities in the form of physical abuse and sexual abuse before the age of 16, separation from parents until the age of 16 (local authority care and/or institutional care), lifetime experiences of bullying, and lifetime experiences of domestic violence. Additionally, we included sex, age, ethnic origin (White, Black, South Asian, Mixed/Other), cannabis use in the past year, alcohol use, and socioeconomic deprivation. For details on these assessments, see supplementary method 2.

### **Identification of network subgroups via recursive partitioning**

In a first step, we estimated a partial correlation network (without regularization) based on the full sample, using the *R* package ‘qgraph’, version 1.6.5 (Epskamp et al., 2012). A partial correlation network depicts unique pairwise associations between variables (‘edges’ in network terminology), i.e., the share of the association between two variables that remains after controlling for all other variables in the network (Epskamp et al., 2018). We estimated the underlying zero-order correlations between the binary items using Pearson’s  $\phi$  (Jones et al., 2020). The stronger the partial correlation between two variables, the more likely it is that they co-occur, controlling for the other variables under consideration.

Second, we used a model-based recursive partitioning approach to identify meaningful subgroups of symptom networks given the included environmental and demographic factors, as implemented in the *R* package ‘networktree’, version 1.0.1 (Jones et al., 2020). In brief, recursive partitioning sequentially creates a decision tree by either splitting or not splitting the sample along a set of potential moderating variables (Strobl et al., 2009; Zeileis et al., 2008). The ‘networktree’ approach (figure 1) determines sample splits based on significant invariance in the correlation matrix of the network variables under consideration, yielding non-overlapping partitions of the sample with maximally heterogeneous symptom networks (Jones et al., 2020). For a detailed account, we refer to supplementary method 3 and available methodological articles (Jones et al., 2020; Strobl et

al., 2009; Zeileis et al., 2008). For plotting, we transformed the correlation matrices to partial correlation matrices using the *R* package ‘qgraph’, such that edges reflect unique associations between two variables.

### **Comparison of identified subgroups**

To delineate specific network differences between the identified subgroups (i.e., differences between subgroups as defined by a splitting factor in the recursive partitioning approach), we compared the overall strength of symptom connections, defined as the absolute sum of all individual partial correlation coefficients in the network (global strength;  $S$ ), and differences in estimates of individual partial correlation coefficients (individual edge weights;  $\rho$ ) within a Bayesian framework, using the *R* package ‘BGGM’, version 2.0.2 (Williams, 2021; Williams et al., 2020; Williams & Mulder, 2019). Specifically, we used posterior predictive checks for assessing differences in overall connection strength (Williams et al., 2020), and evaluated the posterior distribution for each difference in partial correlation coefficients, where we deemed a difference significant if the 95% credible interval did not contain 0 (Williams, 2021). *P*-values derived from recursive partitioning are denoted as  $p_{RP}$ , while *p*-values derived from post-hoc comparisons implemented in the package ‘BGGM’ are denoted as  $p_{BGGM}$ .

--- Figure 1 ---

### **Stability of symptom networks in identified subgroups**

We investigated stability of symptom networks estimated in the full sample and identified subgroups by testing sensitivity to dropping cases. Specifically, we assessed the degree to which edge weights remained the same after re-estimating the network with less cases via the correlation stability (CS) coefficient, using the *R* package ‘bootnet’, version 1.4.3 (Epskamp et al., 2018). The CS coefficient represents the maximum proportion of cases

that can be dropped, such that the correlation between original edge weights and edge weights of networks based on subsets is 0.7 or higher (95% confidence). The CS-coefficient should preferably be above 0.5 (good stability), and not be below 0.25 (acceptable stability) (Epskamp et al., 2018).

## Results

### Sample

Following removal of 161 participants (2.2% of the whole sample) with missing values in the variables of interest, the final sample comprised 7,242 participants, 56.8% of whom were women, with an average age of 50 ( $IQR = 30$ ) years. Participants excluded due to missing data were on average older, less White and reported lower proportions of alcohol use and hallucinatory experiences, and higher proportions of depressive symptoms (supplementary table 1).

### Network variables and potential moderators

Table 1 presents positive endorsement and characteristics of the network variables and potential moderating risk factors in the sample. The most prevalent symptom was worry, and the most prevalent risk factor bullying.

### Overall symptom network structure and subgroups

The partial correlation network estimated in the full sample suggested positive relationships between all symptoms, with a mean edge weight of 0.11. Partial correlations within each symptom domain were, on average, stronger than between the groups. Recursive partitioning revealed that six of the tested demographic and environmental risk factors were linked to significant heterogeneity in symptom networks and split the sample accordingly in a hierarchical fashion: *sex*, *childhood sexual abuse*, *childhood physical abuse*, *domestic violence*, *cannabis use*, *ethnicity*. Sex was the primary source of heterogeneity (figure 2a,  $p_{RP} < .001$ ): the network of women was overall significantly less strongly connected ( $\Delta S = -0.17$ ,



$p_{\text{BGGM}} = .002$ ), and featured a significantly stronger connection between depression and hallucination ( $\Delta\rho = 0.06$ ), and a significantly weaker connection between sleep problems and persecutory ideation ( $\Delta\rho = -0.07$ ) than the network of men. This means that in women, depression and hallucination were more likely to co-occur than in men, while sleep problems and persecutory ideation were less likely to co-occur than in men. For networks of women and men, see figure 3.

Distinct risk factors explained further heterogeneity in symptom networks of women and men, yielding 8 different network phenotypes in total. Among women, experiences of childhood sexual abuse were the major source of heterogeneity in symptom networks (figure 2b,  $p_{\text{RP}} = .016$ ) linked to a stronger connection between anxiety and persecutory ideation ( $\Delta\rho = 0.09$ ). The difference in global strength of the symptom networks of women who reported sexual abuse and those who did not was not significant ( $\Delta S = 0.08$ ,  $p_{\text{BGGM}} = .482$ ). Among women who reported no childhood sexual abuse, exposure to childhood physical abuse explained further heterogeneity (figure 2c,  $p_{\text{RP}} = .015$ ), and was associated with a significantly stronger association between anxiety and hallucinations ( $\Delta\rho = 0.26$ ). Corresponding symptom networks did not differ significantly in global strength ( $\Delta S = 0.70$ ,  $p_{\text{BGGM}} = .204$ ). Finally, among those women that reported neither sexual nor physical abuse, exposure to domestic violence (figure 2d,  $p_{\text{RP}} = .012$ ) was linked to a stronger connection between worry and depression ( $\Delta\rho = 0.12$ ), as well as persecutory ideation and hallucinations ( $\Delta\rho = 0.19$ ). The difference in global strength of the corresponding symptom networks was not significant ( $\Delta S = 0.32$ ,  $p_{\text{BGGM}} = .113$ ).

Among men, in those who reported having experienced domestic violence (figure 2e,  $p_{\text{RP}} = .007$ ) the connection between sleep problems and anxiety was significantly stronger than in men who did not report past domestic violence ( $\Delta\rho = 0.17$ ). Global strength was not significantly different between the corresponding networks ( $\Delta S = 0.26$ ,  $p_{\text{BGGM}} = .376$ ).

Second, in men not reporting past domestic violence, cannabis use in the past year (figure 2f,  $p_{RP} = .009$ ) was associated with a significantly increased connection between worry and persecutory ideation ( $\Delta\rho = 0.17$ ), and a significantly weaker connection between hallucination and persecutory ideation ( $\Delta\rho = -0.17$ ). Global strength of the corresponding symptom networks did not differ significantly ( $\Delta S = 0.33$ ,  $p_{BGGM} = .126$ ). Finally, men reporting neither domestic violence nor cannabis use were further split by ethnic background (figure 2g,  $p_{RP} = .011$ ): the network of men with a Black or South Asian ethnic background was overall significantly more strongly connected ( $\Delta S = 0.76$ ,  $p_{BGGM} = .003$ ), and showed stronger connections between worry and depression ( $\Delta\rho = 0.25$ ), sleep problems and anxiety ( $\Delta\rho = 0.20$ ), anxiety and depression ( $\Delta\rho = 0.16$ ), depression and persecutory ideation ( $\Delta\rho = 0.21$ ), as well as persecutory ideation and hallucinatory experiences ( $\Delta\rho = 0.20$ ), and a weaker connection between sleep problems and depression ( $\Delta\rho = -0.23$ ) than the network of men from a White or Mixed ethnic background.

Age of the respondent, alcohol use, bullying, separation experiences, and socioeconomic deprivation were not identified as relevant sources of heterogeneity in symptom networks. Repeating analyses based on data from women and men separately yielded identical results regarding sex-specific moderators (supplementary figure 1).

### **Network stability**

The network estimated in the full sample, as well as all identified subgroup networks, showed good stability to dropping cases (supplementary table 2)

--- *Figure 2* ---

--- *Figure 3* ---

## Discussion

In the present study, we employed a novel, data-driven recursive partitioning approach in a large national household survey to identify networks of psychotic and affective experiences in the population. Our findings point to considerable heterogeneity, which we explain with several phenotypic systems: six (out of eleven) demographic and environmental risk factors yielded eight different network phenotypes, with sex being the primary source of heterogeneity in symptom networks. Among women and men, different risk factors were related to heterogeneity in symptom networks, suggesting potentially distinct relevance and mechanisms of these risk factors across the sexes, in line with a multidimensional model of sexual differentiation in psychosis risk (Riecher-Rössler et al., 2018). Overall, our findings on sex and other environmental differences illustrate that the multifactorial and heterogeneous nature of psychosis expression (Isvoranu et al., 2016; Linscott & van Os, 2013; van Os & Reininghaus, 2016) appears to be reflected in symptom networks that differed considerably depending on the type, combination and strength of demographic and environmental risk in a large general population sample.

### **Differences in symptom networks of women and men**

The identification of multiple network phenotypes substantiates the notion that averaged symptom network models are likely not representative of psychosis expression in the general population (Jones et al., 2020). Rather, observed differences in strength of overall and specific symptom connections may point to diverse etiological mechanisms operating across different demographic and environmental risk factors. Corroborating a growing recognition that understanding variability by sex is central for the development of comprehensive etiological models of psychopathology (Hartung & Lefler, 2019; Hodes & Epperson, 2019; Riecher-Rössler et al., 2018; Rosen et al., 2019), the primary source of heterogeneity in symptom networks of psychosis was sex.

Specifically, our results highlight how associations between affective and psychotic experiences may be differentially expressed in women and men. Following the theory of an affective pathway to psychosis, affective alterations, in particular depression and anxiety, may be fundamental driving forces of psychotic experiences (Betz et al., 2020; Isvoranu et al., 2017; Myin-Germeys & van Os, 2007; Upthegrove et al., 2017, 2020; van Nierop et al., 2018). Present findings suggest a particularly strong association between depression and hallucinatory experiences in the network of women compared to men, corroborating the idea that such an affective pathway to psychosis involving depression may be expressed to a greater degree in women, potentially funneled by increased emotional reactivity to life events and daily hassles (Davis et al., 1999; Hodes & Epperson, 2019; Myin-Germeys & van Os, 2007; Stainton et al., 2021). In the symptom network of men, by contrast, a previously identified link between sleep problems and persecutory ideation (Freeman et al., 2010) was stronger, and therefore, possibly more relevant, than in women. An intriguing potential clinical implication to be tested is that men may, on average, profit in particular from the use of interventions for sleep problems with demonstrated benefit for reducing persecutory ideation (Freeman et al., 2017).

### **Risk factors explaining heterogeneity in symptom networks of women and men**

Among women, heterogeneity in symptom networks of psychosis expression was explained by exposure to interpersonal trauma, including childhood abuse and domestic violence. Specifically, exposure to childhood abuse was linked to stronger associations between anxiety and psychotic experiences. These findings are consistent with previous reports of increased proportions of mixed symptom expression following childhood trauma (Guloksuz et al., 2015; Russell et al., 2020; Upthegrove et al., 2015; van Nierop et al., 2015), but extend the literature by highlighting how sex may be an important determinant in this relationship. Following trauma, women are more likely to blame themselves, to view the

world as dangerous, and to hold more negative views of themselves (Davis et al., 1999; Tolin & Foa, 2002). This may facilitate a pathway from distressing interpretations of everyday events, including the experience of anxiety, to threat beliefs feeding into the formation of psychotic experiences, as proposed in cognitive models of psychosis (Freeman, 2007; Garety et al., 2001; Hardy et al., 2020). Overall, the idea that a pathway from anxiety to psychotic experiences may be particularly relevant among women with a history of childhood abuse has potentially important repercussions for clinical practice and deserves further investigation (Bloomfield et al., 2020). Moreover, at a population level, it may well be that links between affective and psychotic experiences following childhood abuse are manifestations of personality function. The interplay between borderline personality functioning and affective instability, also involving psychosis, and subclinical and clinical levels of psychosis warrant further investigations.

Among men, cannabis use and minority ethnic group status were identified as potential sources of heterogeneity in network connections between psychotic and affective symptoms. Most striking differences were evident in the symptom network of men with a minority ethnic group status reporting no domestic violence or cannabis use. Documented variations in experience and reporting of hallucinations (Vanheusden et al., 2008) and delusions (Berg et al., 2014) in minority ethnic groups seem to extend to the level of symptom networks. Here, they appear to be expressed as an increased co-occurrence of hallucinations and persecutory ideations in men from a minority ethnic background compared to men from the majority White or Mixed ethnic background. This finding agrees with the idea that, under the influence of risk factors, hallucinations and delusions can become connected, which has been linked to worse prognosis and symptom persistence (Binbay et al., 2012; Smeets et al., 2012, 2014; van Os & Reininghaus, 2016). Taken together with the present results, this may reinforce evidence that demonstrates that people from a minority

ethnic background, particularly men, are at increased risk for poor mental health outcomes (Morgan et al., 2017; Singh et al., 2015). With the present data, however, it cannot be excluded that ethnicity acts as a proxy measure for factors not covered by our analysis, such as specific forms of deprivation. Delineating how mental health outcomes in men from a minority ethnic background are determined is an outstanding task for future research and may help to design more effective interventions. Identifying potential commonalities underlying minority ethnic group status and domestic violence, both of which were associated with increased co-occurrence of psychotic experiences in men and women, respectively, may prove insightful in this context.

Except for domestic violence, different risk factors explained heterogeneity in symptom networks of women and men, suggesting a likely complex interplay between sex and risk factors in impacting psychosis risk. Childhood sexual and physical abuse, for instance, were sources of heterogeneity in symptom networks of women, but not men. This finding adds to previous research suggesting particularly detrimental effects of sexual and physical abuse on mental health of girls and women (Adams et al., 2018; Thompson et al., 2004). One reason for the distinct role of adversities may lie in the sex-specific effects they have on the nervous system, against the backdrop of sex differences in maturation, structure and functioning thereof (DeSantis et al., 2011; Dow-Edwards, 2020; Hodes & Epperson, 2019; Popovic et al., 2020). Moreover, characteristics of some risk factors have been shown to differ by sex: men are more likely to engage in more escalating and chronic patterns of cannabis use than women, for example (Hawes et al., 2019; Wagner & Anthony, 2007). Girls, on the other hand, are more likely than boys to experience severe forms of sexual abuse within close victim-perpetrator relationships (Gold et al., 1998; Kendall-Tackett et al., 1993). Such variations may contribute to differing patterns of relationships between risk and symptom expression in women and men.

Overall, our results corroborate a growing realization that research should appraise that mechanisms contributing to psychosis expression may, at least in parts, differ by sex (Hodes & Epperson, 2019; Riecher-Rössler et al., 2018; Rosen et al., 2019; Stainton et al., 2021). As clinical research works towards early identification and individually tailored preventive interventions, the complex interplay between sex and environmental factors in impacting psychosis risk needs to be better understood to optimize these efforts (Hartung & Lefler, 2019; Riecher-Rössler et al., 2018; Rosen et al., 2019; Stainton et al., 2021). This includes disaggregating results by sex and gender in psychosis research more consistently (Hartung & Lefler, 2019), for example by documenting differences and similarities in symptom networks of women and men.

### **Limitations**

Results from the present study should be interpreted given several limitations. First, posterior predictive checks used for comparing the overall network connectivity tend to be conservative (Williams et al., 2020), which may have resulted in low sensitivity in post-hoc comparisons. This may be one reason why we found, contrary to our hypothesis, no evidence that exposure to risk factors was associated with more densely connected symptom networks compared to non-exposure. Effects of risk factors on symptom networks seem to be more specific, impacting single relations between symptoms rather than connectivity between all symptoms. Second, model-based recursive partitioning identifies those variables that reduce heterogeneity in symptom networks the most. Thus, age of the respondent, alcohol use, separation experiences, bullying and socioeconomic deprivation may explain heterogeneity in symptom networks, but not to the same extent as the other risk factors tested. Related, differential relevance of risk factors, for example within ethnic groups, may have remained undetected due to small sample sizes in some subgroups. For a better understanding of the mechanisms relevant in different minority groups, targeted investigations in these populations

with larger sample sizes are needed. Third, we did not incorporate complex design features of the APMS, such as weights to take non-response into account, due to the lack of established methods to do so for network models (Lin et al., 2019). While therefore not fully representative of the English population, our results are based on a large national household survey, with suitability for a data-intensive method, such as network-based recursive partitioning unlike for smaller samples which would not offer the same opportunity. Fourth, the retrospective assessment of risk factors via self-report may be prone to memory biases and so directions of effect may be contested. Fifth, data used in the present analyses were gathered in a large epidemiological study; therefore, instruments and tools used were designed such that they were simple to understand and appropriate given their use in over 7,000 people. This setting necessarily leads to less refined assessments of symptomatology and risk. Finally, the analyses were based on cross-sectional data, meaning that the directions of interactions among the symptoms remain unknown. Estimated group-level networks may also not necessarily be representative of those of individual participants (Robinaugh et al., 2020).

## **Conclusion**

Symptom networks of psychosis expression in the general population are highly heterogeneous. Sex was the primary source of heterogeneity, and different risk factors explained further variability in symptom networks of women and men, potentially reflecting distinct sex-specific mechanisms contributing to psychosis risk. Among women, an affective loading within psychosis, particularly following early interpersonal trauma, may have distinct importance. Among men, the symptom network of those from a minority ethnic background showed a particularly strong connection between hallucinatory experiences and persecutory ideation, which may reflect poorer outcomes including symptom resolution in this group. A



better understanding and consideration of these sex differences provides an important opportunity to deliver high quality prevention and patient-centered care in psychosis.

## **Required Statements**

### **Acknowledgements**

None.

### **Financial Support**

JK has received funding from the German Research Foundation (DFG; grant agreement n° KA 4413/1-1). MR has received funding from the Köln Fortune program (grant agreement n° 304/2020).

### **Conflict of Interest**

The authors declare no conflict of interests with relation to the work reported in this manuscript.

### **Ethical Standards**

The authors assert that all procedures contributing to this work comply with the ethical standards of the relevant national and institutional committees on human experimentation and with the Helsinki Declaration of 1975, as revised in 2008.

## References

- Adams, J., Mrug, S., & Knight, D. C. (2018). Characteristics of child physical and sexual abuse as predictors of psychopathology. *Child Abuse & Neglect, 86*, 167–177.  
<https://doi.org/10.1016/j.chiabu.2018.09.019>
- Bebbington, P. (2015). Unravelling psychosis: psychosocial epidemiology, mechanism, and meaning. *Shanghai Archives of Psychiatry, 27*(2), 70.  
<https://doi.org/10.11919/j.issn.1002-0829.215027>
- Bentall, R. P., Wickham, S., Shevlin, M., & Varese, F. (2012). Do specific early-life adversities lead to specific symptoms of psychosis? A study from the 2007 the Adult Psychiatric Morbidity Survey. *Schizophrenia Bulletin, 38*(4), 734–740.  
<https://doi.org/10.1093/schbul/sbs049>
- Berg, A. O., Andreassen, O. A., Aminoff, S. R., Romm, K. L., Hauff, E., & Melle, I. (2014). The impact of immigration and visible minority status on psychosis symptom profile. *Social Psychiatry and Psychiatric Epidemiology, 49*(11), 1747–1757.  
<https://doi.org/10.1007/s00127-014-0897-x>
- Betz, L. T., Penzel, N., Kambeitz-Illankovic, L., Rosen, M., Chisholm, K., Stainton, A., Haidl, T. K., Wenzel, J., Bertolino, A., Borgwardt, S., Brambilla, P., Lencer, R., Meisenzahl, E., Ruhrmann, S., Salokangas, R. K. R., Schultze-Lutter, F., Wood, S. J., Upthegrove, R., Koutsouleris, N., ... PRONIA consortium. (2020). General psychopathology links burden of recent life events and psychotic symptoms in a network approach. *NPJ Schizophrenia, 6*(1), 40. <https://doi.org/10.1038/s41537-020-00129-w>
- Binbay, T., Drukker, M., Elbi, H., Tanık, F. A., Özkınay, F., Onay, H., Zağlı, N., van Os, J., & Alptekin, K. (2012). Testing the psychosis continuum: differential impact of genetic and nongenetic risk factors and comorbid psychopathology across the entire spectrum of psychosis. *Schizophrenia Bulletin, 38*(5), 992–1002.

<https://doi.org/10.1093/schbul/sbr003>

- Bloomfield, M. A. P., Yusuf, F. N. I. B., Srinivasan, R., Kelleher, I., Bell, V., & Pitman, A. (2020). Trauma-informed care for adult survivors of developmental trauma with psychotic and dissociative symptoms: a systematic review of intervention studies. *The Lancet Psychiatry*, 7(5), 449–462. [https://doi.org/10.1016/S2215-0366\(20\)30041-9](https://doi.org/10.1016/S2215-0366(20)30041-9)
- Davis, M. C., Matthews, K. A., & Twamley, E. W. (1999). Is life more difficult on Mars or Venus? A meta-analytic review of sex differences in major and minor life events. *Annals of Behavioral Medicine*, 21(1), 83–97. <https://doi.org/10.1007/BF02895038>
- DeRosse, P., & Karlsgodt, K. H. (2015). Examining the Psychosis Continuum. *Current Behavioral Neuroscience Reports*, 2(2), 80–89. <https://doi.org/10.1007/s40473-015-0040-7>
- DeSantis, S. M., Baker, N. L., Back, S. E., Spratt, E., Ciolino, J. D., Moran-Santa Maria, M., Dipankar, B., & Brady, K. T. (2011). Gender differences in the effect of early life trauma on hypothalamic-pituitary-adrenal axis functioning. *Depression and Anxiety*, 28(5), 383–392. <https://doi.org/10.1002/da.20795>
- Dow-Edwards, D. (2020). Sex differences in the interactive effects of early life stress and the endocannabinoid system. *Neurotoxicology and Teratology*, 80, 106893. <https://doi.org/10.1016/j.ntt.2020.106893>
- Epskamp, S., Borsboom, D., & Fried, E. I. (2018). Estimating psychological networks and their accuracy: A tutorial paper. *Behavior Research Methods*, 50(1), 195–212. <https://doi.org/10.3758/s13428-017-0862-1>
- Epskamp, S., Cramer, A. O. J., Waldorp, L. J., Schmittmann, V. D., & Borsboom, D. (2012). qgraph: Network visualizations of relationships in psychometric data. *Journal of Statistical Software*, 48(4), 1–18. <https://doi.org/10.18637/jss.v048.i04>
- Freeman, D. (2007). Suspicious minds: the psychology of persecutory delusions. *Clinical*

*Psychology Review*, 27(4), 425–457. <https://doi.org/10.1016/j.cpr.2006.10.004>

Freeman, D., Brugha, T., Meltzer, H., Jenkins, R., Stahl, D., & Bebbington, P. (2010).

Persecutory ideation and insomnia: findings from the second British National Survey of Psychiatric Morbidity. *Journal of Psychiatric Research*, 44(15), 1021–1026.

<https://doi.org/10.1016/j.jpsychires.2010.03.018>

Freeman, D., Sheaves, B., Goodwin, G. M., Yu, L.-M., Nickless, A., Harrison, P. J., Emsley,

R., Luik, A. I., Foster, R. G., Wadekar, V., Hinds, C., Gumley, A., Jones, R., Lightman, S., Jones, S., Bentall, R., Kinderman, P., Rowse, G., Brugha, T., ... Espie, C. A. (2017).

The effects of improving sleep on mental health (OASIS): a randomised controlled trial with mediation analysis. *The Lancet. Psychiatry*, 4(10), 749–758.

[https://doi.org/10.1016/S2215-0366\(17\)30328-0](https://doi.org/10.1016/S2215-0366(17)30328-0)

Garety, P. A., Kuipers, E., Fowler, D., Freeman, D., & Bebbington, P. E. (2001). A cognitive

model of the positive symptoms of psychosis. *Psychological Medicine*, 31(2), 189–195.

<https://doi.org/10.1017/s0033291701003312>

Gold, S. N., Elhai, J. D., Lucenko, B. A., Swingle, J. M., & Hughes, D. M. (1998). Abuse

characteristics among childhood sexual abuse survivors in therapy: a gender

comparison. *Child Abuse & Neglect*, 22(10), 1005–1012. [https://doi.org/10.1016/S0145-2134\(98\)00085-4](https://doi.org/10.1016/S0145-2134(98)00085-4)

Guloksuz, S., van Nierop, M., Bak, M., de Graaf, R., Ten Have, M., van Dorsselaer, S.,

Gunther, N., Lieb, R., van Winkel, R., Wittchen, H.-U., & van Os, J. (2016). Exposure

to environmental factors increases connectivity between symptom domains in the

psychopathology network. *BMC Psychiatry*, 16, 223. <https://doi.org/10.1186/s12888-016-0935-1>

Guloksuz, S., van Nierop, M., Lieb, R., van Winkel, R., Wittchen, H.-U., & van Os, J.

(2015). Evidence that the presence of psychosis in non-psychotic disorder is

environment-dependent and mediated by severity of non-psychotic psychopathology.

*Psychological Medicine*, 45(11), 2389–2401.

<https://doi.org/10.1017/S0033291715000380>

Hardy, A., O’Driscoll, C., Steel, C., van der Gaag, M., & van den Berg, D. (2020). A network analysis of post-traumatic stress and psychosis symptoms. *Psychological Medicine*, 1–8.

<https://doi.org/10.1017/S0033291720001300>

Hartung, C. M., & Lefler, E. K. (2019). Sex and gender in psychopathology: DSM-5 and beyond. *Psychological Bulletin*, 145(4), 390–409. <https://doi.org/10.1037/bul0000183>

Hawes, S. W., Trucco, E. M., Duperrouzel, J. C., Coxe, S., & Gonzalez, R. (2019).

Developmental pathways of adolescent cannabis use: Risk factors, outcomes and sex-specific differences. *Substance Use & Misuse*, 54(2), 271–281.

<https://doi.org/10.1080/10826084.2018.1517177>

Hodes, G. E., & Epperson, C. N. (2019). Sex Differences in Vulnerability and Resilience to Stress Across the Life Span. *Biological Psychiatry*, 86(6), 421–432.

<https://doi.org/10.1016/j.biopsych.2019.04.028>

Hothorn, T., Hornik, K., van de Wiel, M., & Zeileis, A. (2008). Implementing a Class of Permutation Tests: The coin Package. *Journal of Statistical Software*, 28(8), 1–23.

<https://doi.org/10.18637/jss.v028.i08>

Isvoranu, A.-M., Borsboom, D., van Os, J., & Guloksuz, S. (2016). A Network Approach to Environmental Impact in Psychotic Disorder: Brief Theoretical Framework.

*Schizophrenia Bulletin*, 42(4), 870–873. <https://doi.org/10.1093/schbul/sbw049>

Isvoranu, A.-M., Guloksuz, S., Epskamp, S., van Os, J., Borsboom, D., & GROUP

Investigators. (2019). Toward incorporating genetic risk scores into symptom networks of psychosis. *Psychological Medicine*, 1–8.

<https://doi.org/10.1017/S003329171900045X>

- Isvoranu, A.-M., van Borkulo, C. D., Boyette, L.-L., Wigman, J. T. W., Vinkers, C. H., Borsboom, D., & Group Investigators. (2017). A Network Approach to Psychosis: Pathways Between Childhood Trauma and Psychotic Symptoms. *Schizophrenia Bulletin*, *43*(1), 187–196. <https://doi.org/10.1093/schbul/sbw055>
- Jones, P. J., Mair, P., Simon, T., & Zeileis, A. (2020). Network Trees: A Method for Recursively Partitioning Covariance Structures. *Psychometrika*. <https://doi.org/10.1007/s11336-020-09731-4>
- Kelleher, I., & Cannon, M. (2011). Psychotic-like experiences in the general population: characterizing a high-risk group for psychosis. *Psychological Medicine*, *41*(1), 1–6. <https://doi.org/10.1017/S0033291710001005>
- Kelleher, I., Keeley, H., Corcoran, P., Lynch, F., Fitzpatrick, C., Devlin, N., Molloy, C., Roddy, S., Clarke, M. C., Harley, M., Arseneault, L., Wasserman, C., Carli, V., Sarchiapone, M., Hoven, C., Wasserman, D., & Cannon, M. (2012). Clinicopathological significance of psychotic experiences in non-psychotic young people: evidence from four population-based studies. *The British Journal of Psychiatry: The Journal of Mental Science*, *201*(1), 26–32. <https://doi.org/10.1192/bjp.bp.111.101543>
- Kendall-Tackett, K. A., Williams, L. M., & Finkelhor, D. (1993). Impact of sexual abuse on children: a review and synthesis of recent empirical studies. *Psychological Bulletin*, *113*(1), 164–180. <https://doi.org/10.1037/0033-2909.113.1.164>
- Linscott, R. J., & van Os, J. (2013). An updated and conservative systematic review and meta-analysis of epidemiological evidence on psychotic experiences in children and adults: on the pathway from proneness to persistence to dimensional expression across mental disorders. *Psychological Medicine*, *43*(6), 1133–1149. <https://doi.org/10.1017/S0033291712001626>
- Lin, S.-Y., Fried, E. I., & Eaton, N. R. (2019). The association of life stress with substance

use symptoms: A network analysis and replication. *Journal of Abnormal Psychology*.

<https://doi.org/10.1037/abn0000485>

McManus, S., Meltzer, H., Brugha, T. S., Bebbington, P. E., & Jenkins, R. (2009). *Adult Psychiatric Morbidity in England, 2007: Results of a Household Survey*.

<https://doi.org/10.13140/2.1.1563.5205>

Moffa, G., Catone, G., Kuipers, J., Kuipers, E., Freeman, D., Marwaha, S., Lennox, B. R., Broome, M. R., & Bebbington, P. (2017). Using Directed Acyclic Graphs in Epidemiological Research in Psychosis: An Analysis of the Role of Bullying in Psychosis. *Schizophrenia Bulletin*, 43(6), 1273–1279.

<https://doi.org/10.1093/schbul/sbx013>

Morgan, C., Fearon, P., Lappin, J., Heslin, M., Donoghue, K., Lomas, B., Reininghaus, U., Onyejiaka, A., Croudace, T., Jones, P. B., Murray, R. M., Doody, G. A., & Dazzan, P. (2017). Ethnicity and long-term course and outcome of psychotic disorders in a UK sample: the ÆSOP-10 study. *The British Journal of Psychiatry: The Journal of Mental Science*, 211(2), 88–94. <https://doi.org/10.1192/bjp.bp.116.193342>

Moriarity, D. P., van Borkulo, C., & Alloy, L. B. (2020). Inflammatory phenotype of depression symptom structure: A network perspective. *Brain, Behavior, and Immunity*.

<https://doi.org/10.1016/j.bbi.2020.12.005>

Murphy, J., McBride, O., Fried, E., & Shevlin, M. (2018). Distress, Impairment and the Extended Psychosis Phenotype: A Network Analysis of Psychotic Experiences in an US General Population Sample. *Schizophrenia Bulletin*, 44(4), 768–777.

<https://doi.org/10.1093/schbul/sbx134>

Myin-Germeys, I., & van Os, J. (2007). Stress-reactivity in psychosis: evidence for an affective pathway to psychosis. *Clinical Psychology Review*, 27(4), 409–424.

<https://doi.org/10.1016/j.cpr.2006.09.005>

- National Centre for Social Research, University of Leicester. (2017). *Adult Psychiatric Morbidity Survey, 2007* (Version 6379, 4th ed.) [Data set]. UK Data Service.  
<https://doi.org/10.5255/UKDA-SN-6379-2>
- Popovic, D., Ruef, A., Dwyer, D. B., Antonucci, L. A., Eder, J., Sanfelici, R., Kambeitz-Ilankovic, L., Oztuerk, O. F., Dong, M. S., Paul, R., Paolini, M., Hedderich, D., Haidl, T., Kambeitz, J., Ruhrmann, S., Chisholm, K., Schultze-Lutter, F., Falkai, P., Pergola, G., ... PRONIA Consortium. (2020). Traces of Trauma: A Multivariate Pattern Analysis of Childhood Trauma, Brain Structure, and Clinical Phenotypes. *Biological Psychiatry*, 88(11), 829–842. <https://doi.org/10.1016/j.biopsych.2020.05.020>
- Riecher-Rössler, A., Butler, S., & Kulkarni, J. (2018). Sex and gender differences in schizophrenic psychoses—a critical review. *Archives of Women's Mental Health*, 21(6), 627–648. <https://doi.org/10.1007/s00737-018-0847-9>
- Robinaugh, D. J., Hoekstra, R. H. A., Toner, E. R., & Borsboom, D. (2020). The network approach to psychopathology: a review of the literature 2008-2018 and an agenda for future research. *Psychological Medicine*, 50(3), 353–366.  
<https://doi.org/10.1017/S0033291719003404>
- Rosen, M., Haidl, T. K., Ruhrmann, S., Vogele, K., & Schultze-Lutter, F. (2019). Sex differences in symptomatology of psychosis-risk patients and in prediction of psychosis. *Archives of Women's Mental Health*. <https://doi.org/10.1007/s00737-019-01000-3>
- Russell, J. D., Keding, T. J., He, Q., Li, J. J., & Herringa, R. J. (2020). Childhood exposure to interpersonal violence is associated with greater transdiagnostic integration of psychiatric symptoms. *Psychological Medicine*, 1–9.  
<https://doi.org/10.1017/S0033291720003712>
- Singh, S. P., Brown, L., Winsper, C., Gajwani, R., Islam, Z., Jasani, R., Parsons, H., Rabbie-Khan, F., & Birchwood, M. (2015). Ethnicity and pathways to care during first episode



psychosis: the role of cultural illness attributions. *BMC Psychiatry*, *15*, 287.

<https://doi.org/10.1186/s12888-015-0665-9>

Singleton, N., Bumpstead, R., O'Brien, M., Lee, A., & Meltzer, H. (2003). Psychiatric morbidity among adults living in private households, 2000. *International Review of Psychiatry*, *15*(1-2), 65–73. <https://doi.org/10.1080/0954026021000045967>

Smeets, F., Lataster, T., Dominguez, M.-D.-G., Hommes, J., Lieb, R., Wittchen, H.-U., & van Os, J. (2012). Evidence That Onset of Psychosis in the Population Reflects Early Hallucinatory Experiences That Through Environmental Risks and Affective Dysregulation Become Complicated by Delusions. *Schizophrenia Bulletin*, *38*(3), 531–542. <https://doi.org/10.1093/schbul/sbq117>

Smeets, F., Lataster, T., Viechtbauer, W., Delespaul, P., & G.R.O.U.P. (2014). Evidence That Environmental and Genetic Risks for Psychotic Disorder May Operate by Impacting on Connections Between Core Symptoms of Perceptual Alteration and Delusional Ideation. *Schizophrenia Bulletin*, *41*(3), 687–697. <https://doi.org/10.1093/schbul/sbu122>

Stainton, A., Chisholm, K., Woodall, T., Hallett, D., Reniers, R. L. E. P., Lin, A., & Wood, S. J. (2021). Gender differences in the experience of psychotic-like experiences and their associated factors: A study of adolescents from the general population. *Schizophrenia Research*, *228*, 410–416. <https://doi.org/10.1016/j.schres.2021.01.008>

Strobl, C., Malley, J., & Tutz, G. (2009). An introduction to recursive partitioning: rationale, application, and characteristics of classification and regression trees, bagging, and random forests. *Psychological Methods*, *14*(4), 323–348.

<https://doi.org/10.1037/a0016973>

Thompson, M. P., Kingree, J. B., & Desai, S. (2004). Gender differences in long-term health consequences of physical abuse of children: data from a nationally representative survey. *American Journal of Public Health*, *94*(4), 599–604.

<https://doi.org/10.2105/ajph.94.4.599>

Tolin, D. F., & Foa, E. B. (2002). Gender and PTSD: A cognitive model. In R. Kimerling (Ed.), *Gender and PTSD*, (pp (Vol. 460, pp. 76–97). The Guilford Press, xx.

<https://psycnet.apa.org/fulltext/2003-04410-003.pdf>

Uptegrove, R., Chard, C., Jones, L., Gordon-Smith, K., Forty, L., Jones, I., & Craddock, N. (2015). Adverse childhood events and psychosis in bipolar affective disorder. *The British Journal of Psychiatry: The Journal of Mental Science*, 206(3), 191–197.

<https://doi.org/10.1192/bjp.bp.114.152611>

Uptegrove, R., Lalouis, P., Mallikarjun, P., Chisholm, K., Griffiths, S. L., Iqbal, M., Pelton, M., Reniers, R., Stainton, A., Rosen, M., Ruef, A., Dwyer, D. B., Surman, M., Haidl, T., Penzel, N., Kambeitz-Ilanovic, L., Bertolino, A., Brambilla, P., Borgwardt, S., ... PRONIA Consortium. (2020). The Psychopathology and Neuroanatomical Markers of Depression in Early Psychosis. *Schizophrenia Bulletin*.

<https://doi.org/10.1093/schbul/sbaa094>

Uptegrove, R., Marwaha, S., & Birchwood, M. (2017). Depression and Schizophrenia: Cause, Consequence, or Trans-diagnostic Issue? *Schizophrenia Bulletin*, 43(2), 240–244. <https://doi.org/10.1093/schbul/sbw097>

Vanheusden, K., Mulder, C. L., van der Ende, J., Selten, J.-P., van Lenthe, F. J., Verhulst, F. C., & Mackenbach, J. P. (2008). Associations between ethnicity and self-reported hallucinations in a population sample of young adults in The Netherlands. *Psychological Medicine*, 38(8), 1095–1102. <https://doi.org/10.1017/S0033291707002401>

van Nierop, M., Lecei, A., Myin-Germeys, I., Collip, D., Viechtbauer, W., Jacobs, N., Derom, C., Thiery, E., van Os, J., & van Winkel, R. (2018). Stress reactivity links childhood trauma exposure to an admixture of depressive, anxiety, and psychosis symptoms. *Psychiatry Research*, 260, 451–457.

<https://doi.org/10.1016/j.psychres.2017.12.012>

van Nierop, M., Viechtbauer, W., Gunther, N., van Zelst, C., de Graaf, R., Ten Have, M., van Dorsselaer, S., Bak, M., Genetic Risk and Outcome of Psychosis investigators, & van Winkel, R. (2015). Childhood trauma is associated with a specific admixture of affective, anxiety, and psychosis symptoms cutting across traditional diagnostic boundaries. *Psychological Medicine*, *45*(6), 1277–1288.

<https://doi.org/10.1017/S0033291714002372>

van Os, J., & Reininghaus, U. (2016). Psychosis as a transdiagnostic and extended phenotype in the general population. *World Psychiatry: Official Journal of the World Psychiatric Association*, *15*(2), 118–124. <https://doi.org/10.1002/wps.20310>

Wagner, F. A., & Anthony, J. C. (2007). Male-female differences in the risk of progression from first use to dependence upon cannabis, cocaine, and alcohol. *Drug and Alcohol Dependence*, *86*(2-3), 191–198. <https://doi.org/10.1016/j.drugalcdep.2006.06.003>

Williams, D. R. (2021). Bayesian Estimation for Gaussian Graphical Models: Structure Learning, Predictability, and Network Comparisons. *Multivariate Behavioral Research*, 1–17. <https://doi.org/10.1080/00273171.2021.1894412>

Williams, D. R., & Mulder, J. (2019). *BGGM: A R package for Bayesian Gaussian Graphical Models*. <https://psyarxiv.com/3b5hf/download?format=pdf>

Williams, D. R., Rast, P., Pericchi, L. R., & Mulder, J. (2020). Comparing Gaussian graphical models with the posterior predictive distribution and Bayesian model selection. *Psychological Methods*, *25*(5), 653–672. <https://doi.org/10.1037/met0000254>

Wüsten, C., Schlier, B., Jaya, E. S., Genetic Risk and Outcome of Psychosis (GROUP) Investigators, Fonseca-Pedrero, E., Peters, E., Verdoux, H., Woodward, T. S., Ziermans, T. B., & Lincoln, T. M. (2018). Psychotic Experiences and Related Distress: A Cross-national Comparison and Network Analysis Based on 7141 Participants From 13

Countries. *Schizophrenia Bulletin*, 44(6), 1185–1194.

<https://doi.org/10.1093/schbul/sby087>

Zeileis, A., Hothorn, T., & Hornik, K. (2008). Model-Based Recursive Partitioning. *Journal of Computational and Graphical Statistics*, 17(2), 492–514.

<https://doi.org/10.1198/106186008X319331>

### Figure Captions

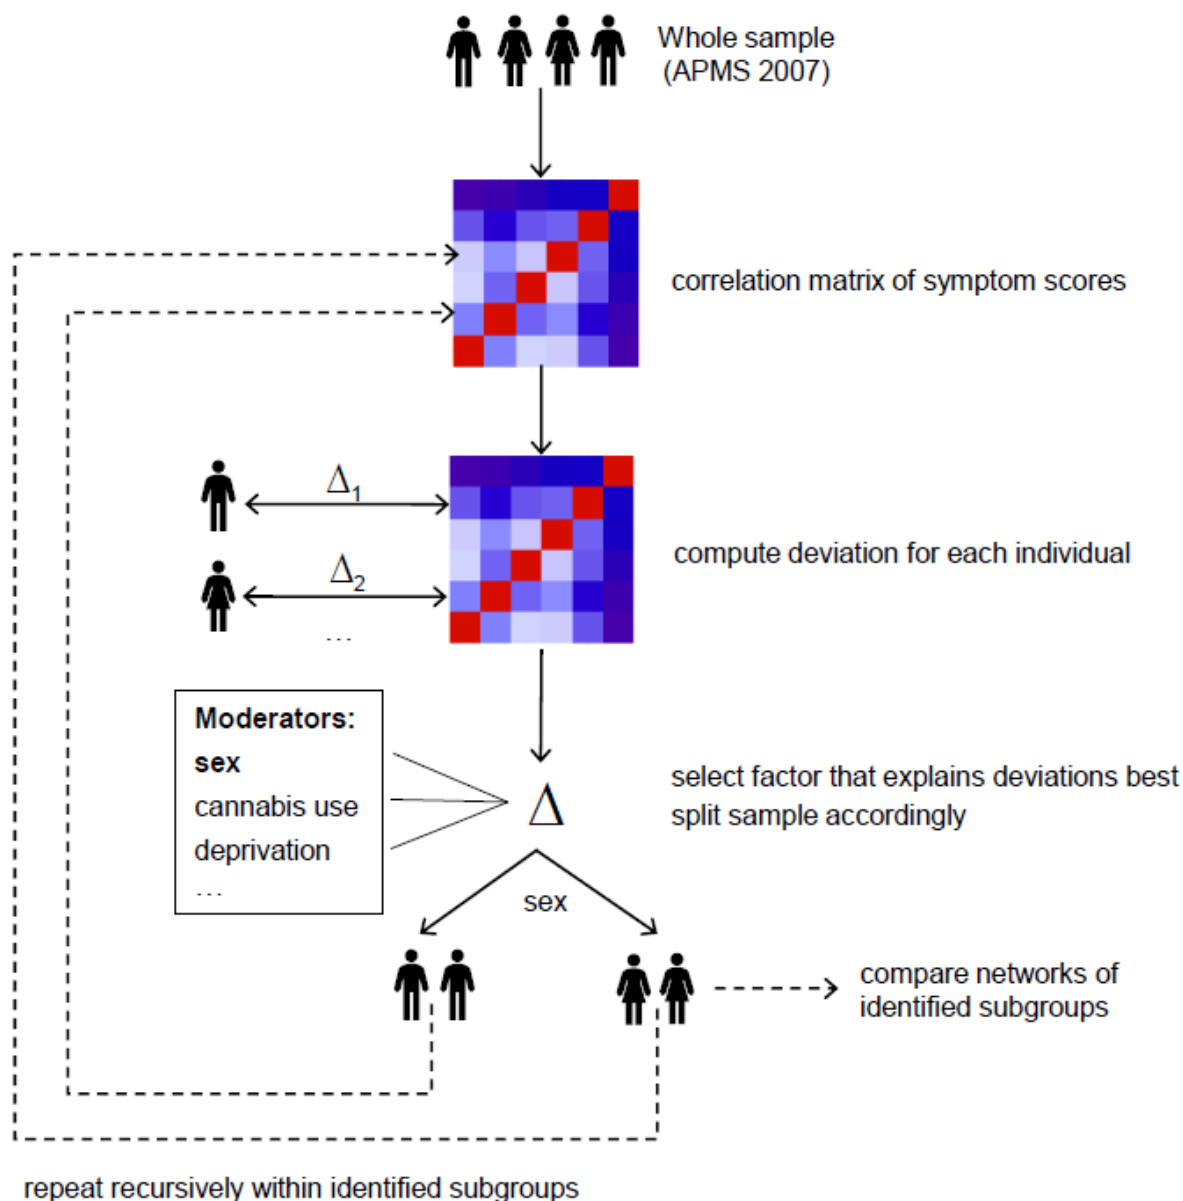

*Figure 1.* Recursive partitioning for symptom networks as applied to data from the 2007 Adult Psychiatric Morbidity Survey (APMS). The goal is to identify which of the included demographic and risk factors capture individual deviations from the correlation matrix of symptom scores, which underlies symptom networks. Starting with the whole sample, individual deviations from the correlation matrix of symptom scores are computed via a log-likelihood-based score function. The variable that explains these deviations best, as

determined by a minimum  $p$ -value strategy at Bonferroni-corrected  $\alpha$ , is selected (here: sex), and the sample split accordingly. Within the identified subgroups, the procedure is repeated recursively until no significant deviations, i.e., heterogeneity, is detected. We compared symptom networks of the identified subgroups in terms of global strength and individual edge weights. For a detailed account of the method, see supplementary method 3 and Jones et al. (2020).

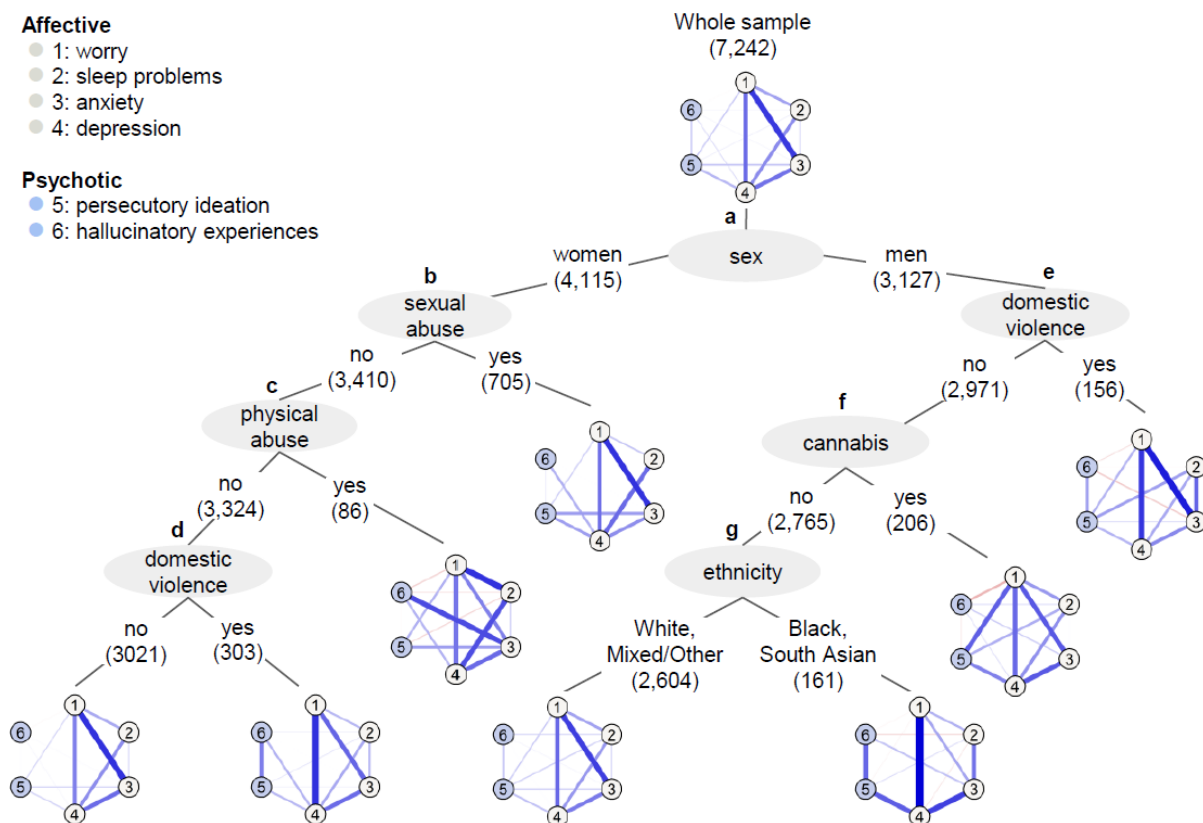

*Figure 2.* Results from recursive partitioning, depicted as a decision tree of partial correlation networks. Numbers behind splitting factors give the sample size retained after the corresponding sample split. Symptom groups are differentiated by color. The thicker and less transparent the edge, the stronger the partial correlation between two symptoms. Blue (red) edges indicate positive (negative) relationships. To ensure visual comparability, edge weights were scaled identically across all networks. Only connections representing edge weights larger than 0.01 are depicted.

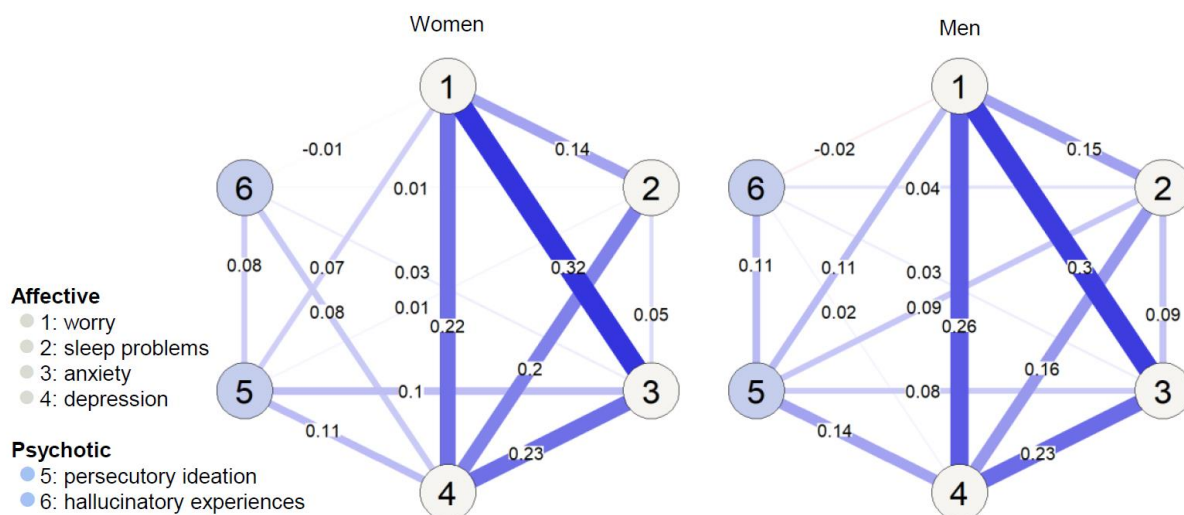

*Figure 3.* Partial correlation networks estimated in women (n = 4,115) and men (n = 3,127).

Sex was identified as the first split in the recursive partitioning approach, suggesting that sex was the primary source of heterogeneity in symptom networks. Symptom groups are differentiated by color. The thicker and less transparent the edge, the stronger the partial correlation between two symptoms. Blue (red) edges indicate positive (negative) relationships. To ensure visual comparability, edge weights were scaled identically across both networks.



*Table 1.* Network variables and potential moderators with positive endorsement (%) or median (IQR) for the whole sample and disaggregated by sex.

| Variable<br>Yes (%) / Median (IQR)   | Whole Sample<br>(n = 7,242)                                       | Women<br>(n = 4,115)                                              | Men<br>(n = 3,127)                                                |
|--------------------------------------|-------------------------------------------------------------------|-------------------------------------------------------------------|-------------------------------------------------------------------|
| <b>Network Variables</b>             |                                                                   |                                                                   |                                                                   |
| worry                                | 36.0                                                              | 40.2                                                              | 30.5                                                              |
| sleep problems                       | 34.6                                                              | 41.4                                                              | 25.8                                                              |
| anxiety                              | 17.3                                                              | 19.4                                                              | 14.5                                                              |
| depression                           | 22.9                                                              | 25.5                                                              | 19.4                                                              |
| persecutory ideation                 | 7.7                                                               | 7.1                                                               | 8.4                                                               |
| hallucinatory experiences            | 0.80                                                              | 1.0                                                               | 0.70                                                              |
| <b>Potential Moderators</b>          |                                                                   |                                                                   |                                                                   |
| sex (% female)                       | 56.8                                                              | n/a                                                               | n/a                                                               |
| age (years)                          | 50 (30)                                                           | 50 (30)                                                           | 50 (28)                                                           |
| ethnic background                    | White: 92.7, Black:<br>2.6, South Asian: 2.6,<br>Mixed/Other: 2.1 | White: 93.1, Black:<br>2.7, South Asian: 2.1,<br>Mixed/Other: 2.1 | White: 92.1, Black:<br>2.4, South Asian: 3.3,<br>Mixed/Other: 2.1 |
| deprivation                          | 3 (2)                                                             | 3 (2)                                                             | 3 (2)                                                             |
| bullying                             | 18.9                                                              | 19.0                                                              | 18.8                                                              |
| separation from parents              | 3.4                                                               | 3.0                                                               | 4.0                                                               |
| domestic violence                    | 9.5                                                               | 12.9                                                              | 5.0                                                               |
| physical abuse                       | 4.8                                                               | 4.2                                                               | 5.5                                                               |
| sexual abuse                         | 13.5                                                              | 17.1                                                              | 8.7                                                               |
| cannabis use in past year            | 5.7                                                               | 4.1                                                               | 7.8                                                               |
| alcohol consumption<br>(AUDIT score) | 4 (5)                                                             | 3 (4)                                                             | 5 (6)                                                             |

## **Supplementary material:**

### **Disentangling heterogeneity of psychosis expression in the general population: sex-specific moderation effects of environmental risk factors on symptom networks**

Linda T. Betz, Nora Penzel, Marlene Rosen, Rachel Upthegrove, Kamaldeep Bhui, Joseph  
Kambeitz

**Supplementary method 1.** Assessment of psychopathology.

**Supplementary method 2.** Assessment of demographic and environmental risk factors.

**Supplementary method 3.** Identification of network subgroups via recursive partitioning.

**Supplementary table 1.** Comparison of participants included in and excluded from the analysis due to missing values.

**Supplementary table 2.** Results from case-drop subset bootstrapping.

**Supplementary figure 1.** Results from recursive partitioning disaggregated by sex, depicted as decision trees of partial correlation networks.

## Supplementary methods

### Supplementary method 1. Assessment of psychopathology.

We obtained affective symptoms of worry, sleep disturbance, generalized anxiety and depression from the Revised Version of the Clinical Interview Schedule (CIS-R; Lewis et al., 1992). We coded these symptoms as present if they had been reported in the past month and persisted for at least two weeks (Moffa et al., 2017). Persecutory ideation and hallucinatory experiences were obtained from the Psychosis Screening Questionnaire (Bebbington & Nayani, 1995). Persecutory ideation was defined as present given a positive response to the question: ‘Over the past year, have you felt that people were deliberately acting to harm you/your interests?’. Similarly, hallucinatory experiences were defined as a positive response to the question: ‘In the past year, have you ever heard voices saying quite a few words or sentences when there was no-one around that might explain it?’

### Supplementary method 2. Assessment of demographic and environmental risk factors.

**Early-life adversities.** Early-life adversities comprised physical abuse and sexual abuse before the age of 16, as well as separation experiences from parents (institutional care and local authority care until the age of 16).

Specifically, physical abuse was defined as a positive response to the question: ‘Before the age of 16, were you ever severely beaten by a parent, step-parent or carer?’. Sexual abuse was defined via a positive endorsement of any of the following questions: ‘Before the age of 16, did anyone talk to you in a sexual way that made you feel uncomfortable?’, ‘Before the age of 16, did anyone touch you, or get you to touch them, in a sexual way without your consent?’, and ‘Before the age of 16, did anyone have sexual intercourse with you without your consent?’.

Two items taken from the ‘parenting’ section of the APMS (National Centre for Social Research, University of Leicester, 2017) were selected to define separation from parents, requiring “yes” responses to at least one of the following questions: Institutional care: ‘Up to the age of 16 did you spend any time in any kind of institution such as a children’s home, borstal, or young offenders unit?’; Local Authority care: ‘Were you ever taken into Local Authority care (i.e., into a children’s home or foster care) as a child up until the age of 16?’

**Later-life adversities.** Later-life adversities comprised bullying, domestic violence, cannabis use in the past year, alcohol use, ethnic background, and deprivation.

Specifically, respondents had to select ‘bullying’ and/or ‘violence in the home’ from a list of options on a card following the question, ‘Now looking at this card, could you tell me if you have ever experienced any of these problems or events, at any time in your life?’. We coded responses as “yes” if the respective risk factor was reported and “no” if not.

Cannabis use in the past year was defined via a positive response to the question ‘Have you used cannabis in the last year?’.

Alcohol use was assessed with the Alcohol Use Disorders Identification Test (AUDIT; Saunders et al., 1993). The range of possible scores is from 0 to 40 where 0 indicates an abstainer who has never had any problems from alcohol. A score of 1 to 7 suggests low-risk consumption according to World Health Organization (WHO) guidelines. Scores from 8 to 14 suggest hazardous or harmful alcohol consumption and a score of 15 or more indicates the likelihood of alcohol dependence (moderate-severe alcohol use disorder).

Respondents were also asked to indicate their ethnicity, and our analyses included four categories: White, Black, South Asian and Mixed/Other.

Deprivation in the APMS 2007 was assessed via index of multiple deprivation (IMD) 2004 data. This is a derived measure of social and economic deprivation based on seven

domains or neighborhood variables: income; employment; health and disability; education, skills and training; barriers to housing and services; living environment; and crime. Data for the IMD 2004 was collected between 1997 and 2003 and the APMS 2007 (National Centre for Social Research, University of Leicester, 2017) reported 5 quintiles of deprivation, where 1 represents the least deprived and 5 represents most deprived.

### **Supplementary method 3. Identification of network subgroups via recursive partitioning.**

We used a model-based recursive partitioning approach to identify meaningful subgroups given the included environmental and demographic factors, as implemented in the *R* package ‘networktree’, version 1.0.1 (Jones et al., 2020). The ‘networktree’ approach determines sample splits based on significant invariance in the correlation matrix of the network variables under consideration, yielding non-overlapping partitions of the sample with maximally heterogeneous symptom networks (Jones et al., 2020). Specifically, a log-likelihood-based score function is used to assess how much each participant deviates from parameters (i.e., pairwise correlation-coefficients in the correlation matrix that are the basis for network models) estimated in the full sample. In a well-fitting symptom network model not subject to significant heterogeneity, individual deviations should be close to 0 and randomly fluctuate around it. Based on structural change tests, *p*-values are generated for each moderating variable, assessing the extent to which a given moderating variable can capture deviations in parameters, i.e., heterogeneity in symptom networks. The moderating variable with the lowest *p*-value serves as a so-called splitting variable, given that this *p*-value is below  $\alpha$ , which is Bonferroni-corrected for the number of moderating variables tested (Jones et al., 2020). Thus, the algorithm prioritizes the “biggest” splits first. The procedure of testing for invariance in network structures is repeated recursively within the newly identified subgroups until no significant invariance in network structures can be detected. To ensure stability and interpretability of the results, we set the minimum number of

observations within any final group of the decision tree to 1% of the total sample size, i.e.,

73.

## Supplementary tables

**Supplementary table 1.** Comparison of participants included in and excluded from the analysis due to missing values. We used permutation-tests as implemented in the *R* package ‘coin’ (Zeileis et al., 2008), specifically the Pearson  $\chi^2$ -test for count data, and the Wilcoxon-test for interval data.

| Variable<br>Yes (%) / Median (IQR) | Included<br>(n = 7,242)                                     | Excluded<br>(n = 161)                                       | Test statistic, <i>p</i> -value |
|------------------------------------|-------------------------------------------------------------|-------------------------------------------------------------|---------------------------------|
| <b>Network Variables</b>           |                                                             |                                                             |                                 |
| worry                              | 36.0                                                        | 33.8                                                        | $\chi^2 = 0.32, p = .609$       |
| sleep problems                     | 34.6                                                        | 41.6                                                        | $\chi^2 = 3.37, p = .082$       |
| anxiety                            | 17.3                                                        | 18.6                                                        | $\chi^2 = 0.21, p = .676$       |
| depression                         | 22.9                                                        | 35.0                                                        | $\chi^2 = 12.8, p < .001$       |
| persecutory ideation               | 7.7                                                         | 7.7                                                         | $\chi^2 = 0.001, p = 1$         |
| hallucinatory experiences          | 0.80                                                        | 0.50                                                        | $\chi^2 = 22.5, p < .001$       |
| <b>Potential Moderators</b>        |                                                             |                                                             |                                 |
| sex (% female)                     | 56.8                                                        | 56.5                                                        | $\chi^2 = 0.006, p = 1$         |
| age (years)                        | 50 (30)                                                     | 58 (40)                                                     | $Z = 4.53, p < .001$            |
| ethnic background                  | White: 92.7, Black: 2.6, South Asian: 2.6, Mixed/Other: 2.1 | White: 85.6, Black: 1.8, South Asian: 7.2, Mixed/Other: 5.4 | $\chi^2 = 14.8, p = .006$       |
| deprivation                        | 3 (2)                                                       | 3 (3)                                                       | $Z = 2.76, p = .005$            |
| bullying                           | 18.9                                                        | 19.1                                                        | $\chi^2 = 0.003, p = 1$         |
| separation from parents            | 3.4                                                         | 4.2                                                         | $\chi^2 = 0.12, p = .794$       |
| domestic violence                  | 9.5                                                         | 8.7                                                         | $\chi^2 = 0.08, p = .877$       |
| physical abuse                     | 4.8                                                         | 8.5                                                         | $\chi^2 = 2.09, p = .151$       |
| sexual abuse                       | 13.5                                                        | 10.8                                                        | $\chi^2 = 0.41, p = .595$       |
| cannabis use in past year          | 5.7                                                         | 2.6                                                         | $\chi^2 = 2.00, p = .212$       |
| alcohol consumption (AUDIT score)  | 4 (5)                                                       | 2 (5)                                                       | $Z = -4.60, p < .001$           |

**Supplementary table 2.** Results from case-drop subset bootstrapping (Costenbader & Valente, 2003; Epskamp et al., 2018). For subgroup networks, see figure 2 in main manuscript.

| Subgroup                        | CS coefficient |
|---------------------------------|----------------|
| Full sample                     | 0.75           |
| <i>First split (figure 2a)</i>  |                |
| women                           | 0.75           |
| men                             | 0.75           |
| <i>Second split (figure 2b)</i> |                |
| sexual abuse: yes               | 0.75           |
| sexual abuse: no                | 0.75           |
| <i>Third split (figure 2c)</i>  |                |
| physical abuse: yes             | 0.28           |
| physical abuse: no              | 0.75           |
| <i>Fourth split (figure 2d)</i> |                |
| domestic violence: yes          | 0.52           |
| domestic violence: no           | 0.75           |
| <i>Fifth split (figure 2e)</i>  |                |
| domestic violence: yes          | 0.44           |
| domestic violence: no           | 0.75           |
| <i>Fifth split (figure 2f)</i>  |                |
| cannabis: yes                   | 0.44           |
| cannabis: no                    | 0.75           |
| <i>Sixth split (figure 2g)</i>  |                |
| ethnicity: Black or South Asian | 0.52           |
| ethnicity: White or Mixed/Other | 0.75           |

*Abbreviations:* CS coefficient = correlation stability coefficient.



## Supplementary figures

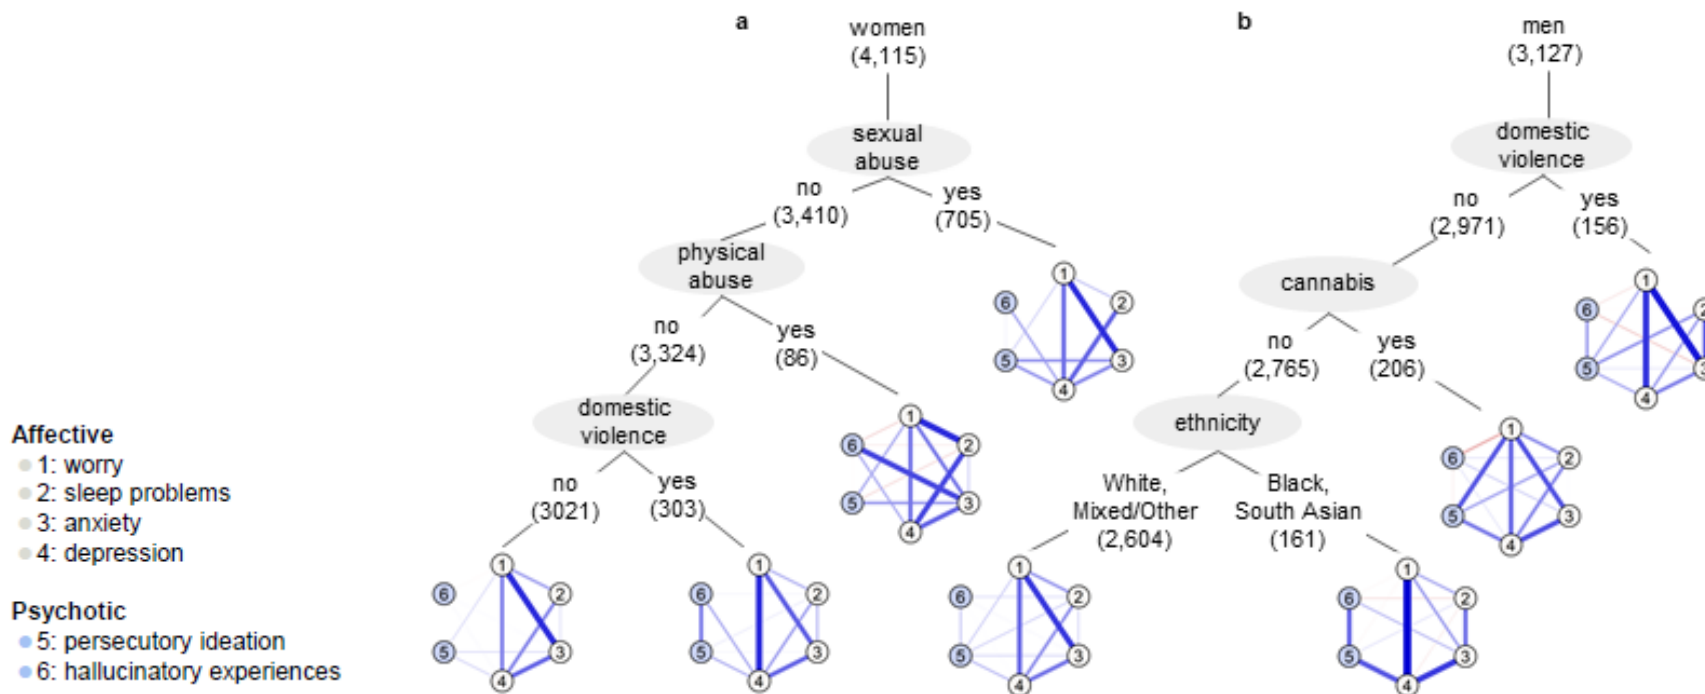

**Supplementary figure 1.** Results from recursive partitioning disaggregated by sex, depicted as decision trees of partial correlation networks. Numbers behind splitting factors give the sample size retained after the corresponding sample split. Symptom groups are differentiated by color. The thicker and less transparent the edge, the stronger the partial correlation between two symptoms. Blue (red) edges indicate positive (negative) relationships. To ensure visual comparability, edge weights were scaled identically across all networks. Only edge weights larger than 0.01 are depicted.

## Supplementary References

- Bebbington, P., & Nayani, T. (1995). The Psychosis Screening Questionnaire. *International Journal of Methods in Psychiatric Research*, 5(1), 11–19.  
<https://psycnet.apa.org/fulltext/1995-39335-001.pdf>
- Costenbader, E., & Valente, T. W. (2003). The stability of centrality measures when networks are sampled. *Social Networks*, 25(4), 283–307. [https://doi.org/10.1016/S0378-8733\(03\)00012-1](https://doi.org/10.1016/S0378-8733(03)00012-1)
- Epskamp, S., Borsboom, D., & Fried, E. I. (2018). Estimating psychological networks and their accuracy: A tutorial paper. *Behavior Research Methods*, 50(1), 195–212.  
<https://doi.org/10.3758/s13428-017-0862-1>
- Jones, P. J., Mair, P., Simon, T., & Zeileis, A. (2020). Network Trees: A Method for Recursively Partitioning Covariance Structures. *Psychometrika*.  
<https://doi.org/10.1007/s11336-020-09731-4>
- Lewis, G., Pelosi, A. J., Araya, R., & Dunn, G. (1992). Measuring psychiatric disorder in the community: a standardized assessment for use by lay interviewers. *Psychological Medicine*, 22(2), 465–486. <https://doi.org/10.1017/s0033291700030415>
- Moffa, G., Catone, G., Kuipers, J., Kuipers, E., Freeman, D., Marwaha, S., Lennox, B. R., Broome, M. R., & Bebbington, P. (2017). Using Directed Acyclic Graphs in Epidemiological Research in Psychosis: An Analysis of the Role of Bullying in Psychosis. *Schizophrenia Bulletin*, 43(6), 1273–1279.  
<https://doi.org/10.1093/schbul/sbx013>
- National Centre for Social Research, University of Leicester. (2017). *Adult Psychiatric Morbidity Survey, 2007* (Version 6379, 4th ed.) [Data set]. UK Data Service.  
<https://doi.org/10.5255/UKDA-SN-6379-2>
- Saunders, J. B., Aasland, O. G., Babor, T. F., de La Fuente, J. R., & Grant, M. (1993).

Development of the Alcohol Use Disorders Identification Test (AUDIT): WHO

Collaborative Project on Early Detection of Persons with Harmful Alcohol

Consumption-II. *Addiction*, 88(6), 791–804. <https://doi.org/10.1111/j.1360->

0443.1993.tb02093.x

Zeileis, A., Hothorn, T., & Hornik, K. (2008). Model-Based Recursive Partitioning. *Journal of Computational and Graphical Statistics*, 17(2), 492–514.

<https://doi.org/10.1198/106186008X319331>
